# Supplementary material for: Phytoplankton Communities’ Response to Thermal Stratification and Changing Environmental Conditions in a Deep-Water Reservoir: Stochastic and Deterministic Processes
Source: MDPI journal article supplement (doi:10.3390/su16073058), 2024-04-06
Supplement: s1 [file s1]

# Phytoplankton Communities' Response to Thermal Stratification and Changing Environmental Conditions in a Deep-Water Reservoir: Stochastic and Deterministic Processes

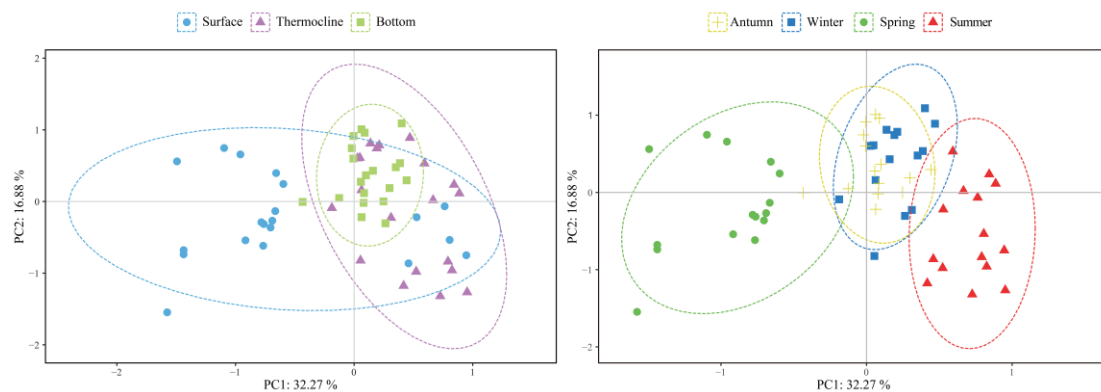

**Supplementary Figure S1.** Principal component analysis (PCA) of water environmental factors (A) Spatial variation (B) Season variation (Environmental factors include WT (°C), pH, Cond (μS/cm), TDS (mg/L), ORP (mV), DO (mg/L), COD<sub>Mn</sub> (mg/L), TOC (mg/L), TP (mg/L), TN (mg/L), NO<sub>3</sub><sup>-</sup>-N (mg/L) and NH<sub>4</sub><sup>+</sup>-N (mg/L))

**Supplementary Table S1** Depth and transparency (Secchi depth [SD]) at sampling sites.

| Sampling point | Autumn 2021 |        | Winter 2022 |        | Spring 2022 |        | Summer 2022 |        |
|----------------|-------------|--------|-------------|--------|-------------|--------|-------------|--------|
|                | Depth (m)   | SD (m) |
| S1             | 49          | 4.2    | 43          | 4.3    | 19.5        | 5.0    | 37          | 3.8    |
| S2             | 40          | 5.2    | 27          | 4.2    | 20          | 4.0    | 27          | 4.2    |
| S3             | 34          | 5.6    | 19          | 4.3    | 35          | 4.0    | 19          | 4.3    |
| S4             | 31          | 4.7    | 26          | 5.2    | 49          | 5.0    | 28          | 4.0    |
| S5             | 40          | 5.2    | 53          | 4.0    | 40          | 3.9    | 46          | 4.5    |

**Supplementary Table S2.** Dominant species and dominance degree of phytoplankton.

| Phylum          | Species                                            | Surface | Thermocline | Bottom |
|-----------------|----------------------------------------------------|---------|-------------|--------|
| Cyanobacteria   | <i>Anabaena</i> sp.                                | 0.051   | 0.104       | 0.057  |
|                 | <i>Chroococcus</i> sp.                             | -       | 0.315       | 0.128  |
|                 | <i>Merismopedia punctata</i> Meyen                 | 0.114   | -           | -      |
|                 | <i>Microcystis</i> sp.                             | 0.157   | 0.253       | 0.272  |
|                 | <i>M. marginata</i> Kützing                        | 0.261   | 0.039       | -      |
| Chlorophyta     | <i>Chlamydomonas</i> sp.                           | 0.027   | -           | 0.026  |
|                 | <i>Chlorella vulgaris</i> Beijerinck               | 0.067   | -           | -      |
|                 | <i>Coelastrum altaicum</i> Skvortzov               | 0.098   | -           | -      |
|                 | <i>Oocystis lacustris</i> Chodat                   | 0.111   | 0.072       | 0.024  |
|                 | <i>O. naegelii</i> A.Braun                         | -       | 0.037       | 0.03   |
|                 | <i>Pandorina morum</i> (O.F.Müller) Bory           | 0.055   | -           | 0.033  |
|                 | <i>Pediastrum duplex</i> Meyen                     | -       | 0.034       | -      |
|                 | <i>Scenedesmus</i> sp.                             | -       | -           | 0.047  |
|                 | <i>S. bijugus</i> Kützing                          | 0.099   | 0.024       | 0.07   |
|                 | <i>S. quadricauda</i> (Turpin) Brébisson           | 0.043   | -           | -      |
|                 | <i>Staurastrum</i> sp.                             | -       | 0.023       | -      |
| Bacillariophyta | <i>Asterionella</i> sp.                            | -       | 0.092       | -      |
|                 | <i>Aulacoseira granulate</i> (Ehrenberg) Simonsen  | 0.054   | 0.155       | 0.253  |
|                 | <i>Cocconeis placentula</i> Ehrenberg              | 0.304   | 0.097       | 0.031  |
|                 | <i>Cyclotella</i> sp.                              | 0.366   | 0.735       | 0.980  |
|                 | <i>C. meneghiniana</i> Kützing                     | 0.464   | 0.778       | 0.731  |
|                 | <i>Cymbella</i> sp.                                | 0.033   | 0.024       | —      |
|                 | <i>Fragilaria</i> sp.                              | 0.020   | 0.026       | 0.275  |
|                 | <i>Navicula</i> sp.                                | 0.023   | -           | -      |
|                 | <i>Navicula cincta</i> (Ehrenberg) Ralfs           | 0.048   | 0.085       | 0.051  |
|                 | <i>Synedra</i> sp.                                 | 0.038   | 0.035       | 0.105  |
| Euglenophyta    | <i>Trachelomonas</i> sp.                           | 0.026   | -           | -      |
| Ochrophyta      | <i>Dinobryon</i> sp.                               | 0.043   | -           | -      |
| Dinophyta       | <i>Ceratium hirundinella</i> (O.F.Müller) Dujardin | 0.113   | 0.065       | 0.082  |
|                 | <i>Peridinium</i> sp.                              | 0.491   | 0.143       | 0.039  |
| Cryptophyta     | <i>Cryptomonas</i> sp.                             | 0.037   | 0.096       | 0.120  |
|                 | <i>C. ovata</i> Ehrenberg                          | -       | 0.027       | -      |

Note: “-” indicates that this species appeared during the study period but was not the dominant species.  
This study defines dominance degree  $\geq 0.02$  as the dominant species

**Supplementary Table S3** Permutational multivariate analysis of variance among phytoplankton communities at different depths.

|                         | <b>R<sup>2</sup></b> | <b><i>p</i></b> |                        | <b>R<sup>2</sup></b> | <b><i>p</i></b> |                        | <b>R<sup>2</sup></b> | <b><i>p</i></b> |
|-------------------------|----------------------|-----------------|------------------------|----------------------|-----------------|------------------------|----------------------|-----------------|
| S-aut. VS<br>S-win.     | 0.35084              | 0.014<br>*      | T-aut.<br>VS           | 0.19212              | 0.072           | B-aut.<br>VS           | 0.16779              | 0.088           |
| S-aut. VS<br>S-spr.     | 0.60694              | 0.007<br>**     | T-win.<br>T-aut.<br>VS | 0.43165              | 0.007<br>**     | B-win.<br>B-aut.<br>VS | 0.47048              | 0.009<br>**     |
| S-aut. VS<br>S-sum.     | 0.39154              | 0.009<br>**     | T-spr.<br>T-aut.<br>VS | 0.56936              | 0.007<br>**     | B-spr.<br>B-aut.<br>VS | 0.54328              | 0.006<br>**     |
| S-win.<br>VS S-spr.     | 0.65163              | 0.008<br>**     | T-sum.<br>T-<br>win.VS | 0.42995              | 0.009<br>**     | B-sum.<br>B-<br>win.VS | 0.41510              | 0.008<br>**     |
| S-win.<br>VS S-<br>sum. | 0.53733              | 0.008<br>**     | T-spr.<br>T-<br>win.VS | 0.59675              | 0.008<br>**     | B-spr.<br>B-<br>win.VS | 0.47136              | 0.009<br>**     |
| S-spr. VS<br>S-sum.     | 0.30904              | 0.019<br>*      | T-sum.<br>T-spr.<br>VS | 0.33994              | 0.005<br>**     | B-sum.<br>B-spr.<br>VS | 0.23512              | 0.027<br>*      |
| S-aut. VS<br>T-aut.     | 0.32068              | 0.011<br>*      | T-sum.<br>T-aut.<br>VS | 0.07035              | 0.785           | B-sum.<br>B-aut.<br>VS | 0.38030              | 0.015<br>*      |
| S-win.<br>VS T-<br>win. | 0.31989              | 0.006<br>**     | B-aut.<br>T-<br>win.VS | 0.07539              | 0.859           | S-aut.<br>B-<br>win.VS | 0.34702              | 0.01<br>*       |
| S-spr. VS<br>T-spr.     | 0.44399              | 0.004<br>**     | B-win.<br>T-spr.<br>VS | 0.08791              | 0.651           | S-win.<br>B-spr.<br>VS | 0.50060              | 0.008<br>**     |
| S-sum.<br>VS T-<br>sum. | 0.24263              | 0.037<br>*      | B-spr.<br>T-<br>sum.VS | 0.14150              | 0.221           | S-spr.<br>B-<br>sum.VS | 0.26767              | 0.005<br>**     |
|                         |                      |                 | B-sum.                 |                      |                 | S-sum.                 |                      |                 |

Note: Bolded font indicates significance factor, \* indicates  $p < 0.05$ , \*\* indicates  $p < 0.01$ , S denotes surface layer, T denotes thermocline, B denotes bottom layer, aut. denotes autumn, win. denotes winter, spr. denotes spring, and sum. denotes summer.
